# Supplementary material for: Insights from elastic thermobarometry into exhumation of high-pressure metamorphic rocks from Syros, Greece
Source: Copernicus journal article supplement (doi:10.5194/se-2020-154), 2020-09-14
Supplement: Supplementary file 1 [file supplementary_tables.xlsx]

## Sheet: Table of Contents
Solid Earth
Supplementary Material for:
Insights from elastic thermobarometry into exhumation of high-pressure metamorphic rocks from Syros, Greece
Miguel Cisneros1,2*, Jaime D. Barnes1, Whitney M. Behr1,2, Alissa J. Kotowski1,3*, Daniel F. Stockli1, and Konstantinos Soukis4
1Department of Geological Sciences, Jackson School of Geosciences, University of Texas at Austin, Austin, TX, USA
2*Current address: Geological Institute, ETH Zürich, Zürich, Switzerland
3*Current address: Department of Earth and Planetary Sciences, McGill, Montreal, Canada
4Faculty of Geology and Geoenvironment, NKUA, Athens, Greece
Table Captions
Table S1. Sample localities and mineralogy.
Table S2. Raman data of Herkimer quartz standards.
Table S3. Raman data of quartz-in-epidote-and-garnet measurements and calculated pressures.
Table S4. Comparison of entrapment pressures calculated with internal MATLAB script and EoSFit-Pinc.
Table S5. Quartz-calcite δ18O values of boudin neck precipitates and calculated temperatures.
Table S6. Epidote and omphacite compositions.
Table S7. Recalculation of quartz-in-garnet barometry results from Ashley et al., 2014, Sifnos, Greece.
Table S8. Recalculation of quartz-in-garnet barometry results from Behr et al., 2018, Sifnos, Greece.

## Sheet: Table S1
Table S1. Sample localities and mineralogy.
Locality	Sample	Latitude	Longitude	Rock Type	Orientation	Mineralogya
Kalamisia	KCS70A	37.4201	24.9566	metabasite	Ʇ foliation, ‖ lineation	omp + grt + gln + ep1 + w.m. + oxides ± ab ± qtz
Delfini	KCS34	37.4568	24.8992	metasediment	Ʇ to Ft fold axial plane	qtz + w.m. + ep2 + grt + cal + chl
	KCS1621	37.4565	24.8987	metasediment	Ʇ foliation, ‖ lineation	qtz + ep1 + grt ± w.m. ± amp ± chl
Lotos	SY1402	37.4433	24.8969	metavolcanic	Ʇ foliation, ‖ lineation	ep1 + w.m. + amp + chl + ab + qtz + cal + ox.ides
	SY1405	37.4436	24.8972	metavolcanic	Ʇ foliation, ‖ lineation	ep1 + w.m. + grt + amp + chl + ab + qtz + cal + oxides
	KCS2	37.4433	24.8969	metavolcanic	Ʇ foliation, ‖ lineation	w.m. + ep1 + qtz + ab + cal + oxides ± act ± chl
	KCS3	37.4433	24.8969	metasediment	Ʇ foliation, ‖ lineation	qtz + ep1 ± cal ± w.m. ± grt ± chl
Megas Gialos	KCS50	37.3801	24.9151	metasediment	Ʇ foliation, ‖ lineation	qtz + ep1 + chl ± w.m.
Boudin Neck Samples
Delfini	SY1617	37.4565	24.8987	-	-	qtz + cal + oxide
	SY1618	37.4565	24.8987	-	-	qtz + cal + oxide
	SY1623	37.4543	24.8974	-	-	qtz + cal + oxide
Lotos	SY1613	37.4448	24.8987	-	-	qtz + cal + oxide
aMineral abbreviations: actinolite (act), albite (ab), amphibole (amp), calcite (cal), chlorite (chl), epidote (ep), glacophane (gln), garnet (grt),
omphacite (omp), white mica (w.m.), quartz (qtz).

## Sheet: Table S2
Table S2. Raman data of Herkimer quartz standards.
			ω128b		ω206		ω464			Ar plasma lines measured wavenumbers (ω)
Sample	Analysis Date	Acquistion Timea	(cm-1)	1σ (cm-1)	(cm-1)	1σ (cm-1)	(cm-1)	1σ (cm-1)		116.04 (cm-1)	1σ (cm-1)	266.29 (cm-1)	1σ (cm-1)	520.3 (cm-1)	1σ (cm-1)
Herkimer Quartz	2020.01.24	14:25:35	127.711	0.106905	206.697	0.10828	464.669	0.104361
Herkimer Quartz	2020.01.24	14:26:59	127.711	0.108589	206.651	0.108681	464.665	0.103814
Herkimer Quartz	2020.01.24	14:28:18	127.546	0.108569	206.51	0.106407	464.524	0.104764
Herkimer Quartz	2020.01.24	16:43:23	127.625	0.108891	206.614	0.109097	464.608	0.104616
Herkimer Quartz	2020.01.24	16:46:01	127.425	0.109159	206.489	0.10802	464.418	0.104199
Herkimer Quartz	2020.01.24	16:47:28	127.457	0.108005	206.565	0.107363	464.478	0.104172
Herkimer Quartz	2018.03.13		127.876	0.102007	207.182	0.108168	464.29	0.101488		115.911	0.10008	266.207	0.101381	519.694	0.10072
Herkimer Quartz	2018.03.13		127.897	0.101991	207.128	0.108409	464.277	0.101439		115.922	0.100083	266.237	0.100789	519.682	0.100741
Herkimer Quartz	2018.03.13		127.897	0.102137	207.153	0.109004	464.262	0.101503		115.921	0.100092	266.188	0.110787	519.666	0.100789
Herkimer Quartz	2018.03.13		127.92	0.102202	207.198	0.108928	464.291	0.101494		115.937	0.100089	266.216	0.101373	519.697	0.100768
Herkimer Quartz	2018.03.13		127.879	0.10208	207.17	0.108424	464.259	0.101502		115.897	0.100085	266.194	0.100736	519.67	0.100747
Herkimer Quartz	2018.03.14		128.072	0.0165929	207.297	0.0368031	464.497	0.0158879		115.963	0.00509309	266.279	0.0175029	519.918	0.0144795
Herkimer Quartz	2018.03.14		128.054	0.0171199	207.19	0.0388786	464.484	0.0154901		115.973	0.00465176	266.267	0.015863	519.921	0.0129839
Herkimer Quartz	2018.03.14		128.051	0.016537	207.194	0.0371659	464.462	0.0163169		115.96	0.00427282	266.277	0.0151997	519.913	0.013119
Herkimer Quartz	2018.03.14		128.068	0.0170768	207.199	0.0383531	464.488	0.0157335		115.986	0.00399416	266.272	0.0150693	519.941	0.011943
Herkimer Quartz	2018.03.14		128.04	0.0165024	207.13	0.0378709	464.452	0.0159557		115.97	0.00382429	266.271	0.0131055	519.908	0.0118026
Herkimer Quartz	2018.03.15		127.941	0.102103	207.063	0.109292	464.706	0.101393		115.914	0.100068	266.225	0.101542	520.319	0.100366
Herkimer Quartz	2018.03.15		127.921	0.103051	207.171	0.114536	464.672	0.10174		116	0.100035	266.352	0.100458	520.4	0.100183
Herkimer Quartz	2018.03.15		127.89	0.102728	206.97	0.112489	464.643	0.101907		116.006	0.100036	266.345	0.100605	520.405	0.100223
Herkimer Quartz	2018.03.15		127.937	0.101801	207.05	0.108701	464.687	0.101363		115.865	0.100213	266.197	0.104171	520.264	0.101087
Herkimer Quartz	2018.03.15		127.867	0.102358	207.027	0.11094	464.657	0.10146		115.907	0.100066	266.233	0.100941	520.305	0.100311
Herkimer Quartz	2018.03.16		127.87	0.10534	207.178	0.125902	464.706	0.105153		115.957	0.100142	266.306	0.102706	520.362	0.101104
Herkimer Quartz	2018.03.16		127.919	0.102693	207.137	0.1137	464.693	0.103041		115.83	0.100252	266.232	0.106644	520.242	0.10166
Herkimer Quartz	2018.03.16		127.909	0.103738	207.453	0.117774	464.779	0.103752		115.967	0.100045	266.296	0.100819	520.363	0.100344
Herkimer Quartz	2018.03.16		127.98	0.10318	207.481	0.115814	464.787	0.103356		115.909	0.100069	266.24	0.101624	520.321	0.100287
Herkimer Quartz	2018.03.16		127.877	0.10341	207.178	0.117214	464.698	0.103786		115.938	0.100052	266.289	0.101693	520.347	0.100277
Herkimer Quartz	2018.10.08		128.246	0.0287826	207.333	0.057769	464.757	0.0157788		116.256	0.00722421	266.543	0.0385893	520.267	0.0170396
Herkimer Quartz	2018.10.08		128.246	0.0245863	207.134	0.0495165	464.67	0.0169795		116.25	0.00443598	266.566	0.0243395	520.244	0.0129841
Herkimer Quartz	2018.10.08		128.291	0.027073	207.347	0.0513566	464.71	0.0167161		116.257	0.00433366	266.576	0.0249374	520.249	0.0122093
Herkimer Quartz	2018.10.08		128.317	0.0294164	207.248	0.0589792	464.713	0.017049		116.254	0.00450705	266.577	0.029724	520.261	0.0118937
Herkimer Quartz	2018.10.08		128.274	0.0253889	207.352	0.0507288	464.716	0.015469		116.241	0.0104618	266.571	0.0508736	520.23	0.0267789
Herkimer Quartz	2018.10.08		128.309	0.0303769	207.425	0.0597646	464.714	0.0176833		116.264	0.00353153	266.602	0.0212399	520.257	0.00990847
aAnalyses with an analysis time were carried out at ETH Zurich (ETH), the remaining anlayses were carried out at Virignia Tech (VT).
bPeak position of quartz standards (not plasma line corrected).

## Sheet: Table S3
Table S3. Raman data of quartz-in-epidote-and-garnet measurements and calculated pressures.
					Host	Inclusion	ω128e	ω206	ω464	Δω128f		Δω206		Δω464							128 cm-1		206 cm-1		464 cm-1		Strains	Group Mean		Ptraph		Ar plasma lines measured wavenumbers (ω)i
Sample	Analysis Date	Analysis Timea	Location	Host	#	#	(cm-1)	(cm-1)	(cm-1)	(cm-1)	1σ (cm-1)	(cm-1)	1σ (cm-1)	(cm-1)	1σ (cm-1)		ε1 + ε2g	ε3	χ2		Pinc (MPa)	1σ (MPa)	Pinc (MPa)	1σ (MPa)	Pinc (MPa)	1σ (MPa)	Pinc (MPa)	Pinc ± 1σ (MPa)		(GPa)		116.04 (cm-1)	1σ (cm-1)	266.29 (cm-1)	1σ (cm-1)	520.3 (cm-1)	1σ (cm-1)
KCS70A	2018.03.14		Kalamisia	Garnetb	1	1	131.202	-	470.061	2.87602	0.510377	-	-	5.32375	0.279803		-0.02351	0.00223	-		417.285	81.5112	-	-	594.6	32.5917	731.124	600 ± 78		1.66517		116.24	0.333822	-	-	520.181	0.032628
KCS70A	2018.03.14		Kalamisia	Garnetb	1	2	131.845	220.828	469.72	3.38585	0.20187	13.1717	0.213073	4.98233	0.201987		-0.01346	-0.00274	5.14		499.457	34.7014	486.953	13.5339	555.752	23.8046	594.249			1.42048		116.372	0.00920476	266.728	0.0323313	520.182	0.0127715
KCS70A	2018.03.16		Kalamisia	Garnetb	2	1	-	-	469.82	-	-	-	-	4.80273	0.353494		-	-	-		-	-	-	-	535.356	40.5723	-			1.31843		-	-	-	-	520.612	0.0688696
KCS70A	2018.03.16		Kalamisia	Garnetb	2	2	130.927	-	469.986	2.87696	0.443111	-	-	4.96837	0.217521		-0.01165	-0.00311	-		417.434	70.9105	-	-	554.165	25.5038	546.634			1.33782		116.06	0.0920056	-	-	520.612	0.0688696
KCS70A	2018.03.16		Kalamisia	Garnetb	2	3	130.931	-	470.083	2.88082	0.454915	-	-	5.0657	0.231349		-0.01468	-0.00176	-		418.047	72.7882	-	-	565.229	27.0796	594.392			1.42073		116.06	0.0920056	-	-	520.612	0.0688696
KCS70A	2018.03.14		Kalamisia	Epidotec	1	1	-	-	469.295	-	-	-	-	4.46217	1.50633		-	-	-		-	-	-	-	496.755	170.611	-	544 ± 57		1.33508		-	-	-	-	520.276	0.0278489
KCS70A	2018.03.14		Kalamisia	Epidotec	2	1	131.717	221.826	469.658	3.14122	0.206324	14.1592	0.723064	4.79368	0.211897		-0.01852	0.00017	4.52		459.719	34.689	530.117	33.7108	534.329	24.7947	645.334			1.65269		116.489	0.0245285	-	-	520.308	0.0104567
KCS70A	2018.03.16		Kalamisia	Epidotec	3	1	130.775	219.078	467.991	2.66266	0.639306	11.6937	1.16588	3.05492	0.34882		-0.02368	0.00596	3.27		383.63	100.53	424.085	49.5368	338.284	39.2532	573.99			1.49786		116.122	0.0376401	-	-	520.531	0.0161565
KCS70A	2018.03.16		Kalamisia	Epidotec	3	2	131.454	219.038	468.919	3.32627	0.344648	11.6387	0.632947	3.98372	0.286409		-0.01297	-0.00147	8.1		489.726	57.1507	421.789	27.817	442.69	32.6839	521.437			1.38655		116.137	0.0202226	-	-	520.53	0.0120932
KCS70A	2018.10.08		Kalamisia	Epidotec	4	1	131.899	219.31	469.127	3.03695	0.206864	11.4911	0.243309	3.78744	0.207943		-0.01436	-0.00053	15.4		442.956	34.4764	415.629	13.23	420.566	23.8867	529.321			1.4031		116.835	0.0279678	-	-	520.878	0.0239683
KCS70A	2018.10.08		Kalamisia	Epidotec	4	2	-	-	469.794	-		-	-	4.45452	0.209015		-	-	-		-	-	-	-	495.889	24.3091	-			1.33328		-	-	-	-	520.878	0.0239683
KCS34	2020.01.24	14:36:44	Delfini	Garnetb	1	1	132.025	222.95	471.169	4.37883	0.203853	16.334	0.198334	6.55741	0.110627		-0.01532	-0.00435	7.38		666.587	38.0626	628.451	15.6929	735.786	15.3558	730.219	739 ± 49		1.66352
KCS34	2020.01.24	14:40:51	Delfini	Garnetb	1	2	131.081	220.066	469.141	3.43967	0.233605	13.4521	0.130112	4.53251	0.102911		-0.02054	0.00191	17.2		508.275	39.8405	499.114	11.6256	504.72	12.9695	640.436			1.50188
KCS34	2020.01.24	14:45:42	Delfini	Garnetb	1	3	131.5	221.252	469.566	3.86435	0.849093	14.6405	0.235955	4.96197	0.112066		-0.02349	0.00284	2.03		578.824	143.303	551.49	15.3695	553.438	14.1974	703.742			1.61539
KCS34	2020.01.24	14:49:02	Delfini	Garnetb	1	4	132.279	222.781	470.313	4.64723	0.177481	16.1715	0.117263	5.71185	0.102369		-0.0205	-0.0006	61.7		713.37	34.7383	620.947	13.6938	638.877	13.8115	748.797			1.69752
KCS34	2020.01.24	14:53:44	Delfini	Garnetb	1	5	131.869	222.861	470.6	4.24172	0.160414	16.253	0.174231	6.00289	0.104484		-0.01891	-0.00175	24.9		642.953	30.8016	624.707	14.9976	672.166	14.2663	743.048			1.68698
KCS34	2020.01.24	14:58:30	Delfini	Garnetb	1	6	132.344	224.238	471.118	4.72235	0.208561	17.6329	0.11589	6.52447	0.102013		-0.02143	-0.00132	23.8		726.586	39.9599	689.328	15.0089	732	14.5143	813.064			1.81659
KCS34	2020.01.24	15:05:01	Delfini	Garnetb	1	7	132.397	224.176	471.19	4.78278	0.274549	17.5736	0.220499	6.60256	0.105571		-0.02086	-0.00163	14.2		737.257	51.0928	686.514	17.4001	740.977	14.9212	806.531			1.80438
KCS34	2020.01.24	15:08:09	Delfini	Garnetb	1	8	132.094	222.776	470.628	4.48346	0.1268	16.1749	0.15	6.04331	0.104873		-0.01633	-0.00345	52.6		684.743	26.5195	621.105	14.3596	676.794	14.3392	726.458			1.65666
KCS34	2020.01.24	15:20:11	Delfini	Garnetb	2	1	132.197	223.309	470.865	4.60008	0.167602	16.7141	0.177434	6.29083	0.112163		-0.01781	-0.00293	31.7		705.102	33.0387	646.1	15.4825	705.169	15.2607	755.882			1.71054
KCS34	2020.01.24	15:28:16	Delfini	Garnetb	3	1	131.798	222.707	470.379	4.2098	0.114944	16.1153	0.111426	5.81206	0.102013		-0.01841	-0.00199	51.5		637.476	23.9753	618.358	13.5395	650.331	13.8627	735.92			1.67394
KCS34	2020.01.24	15:32:02	Delfini	Garnetb	3	2	131.872	223.689	470.615	4.28798	0.205941	17.0998	0.199034	6.05144	0.178981		-0.02111	-0.00102	15.5		650.906	38.1038	664.146	16.3833	677.725	21.9497	788.665			1.77112
KCS34	2020.01.24	15:35:59	Delfini	Garnetb	3	3	131.376	221.617	469.689	3.7966	0.389838	15.0291	0.186191	5.12863	0.154409		-0.02275	0.00198	6.59		567.455	66.4129	568.911	14.2619	572.386	18.7343	715.27			1.6363
KCS34	2018.03.13		Delfini	Garnetb	4	1	132.458	223.879	470.244	4.09593	0.205457	16.2849	0.224628	5.42673	0.204931		-0.02118	-0.0002	21.6		618.017	37.4149	626.182	16.3914	606.337	24.3722	755.271			1.70941		116.386	0.0137891	-	-	520.223	0.0308449
KCS34	2018.03.13		Delfini	Garnetb	4	2	133.018	225.086	471.167	4.66148	0.201956	17.3798	0.257661	6.35416	0.206656		-0.01775	-0.00357	19.1		715.873	38.6873	677.339	18.3422	712.436	25.1315	781.756			1.75831		116.38	0.00959697	266.748	0.0745113	520.218	0.0451612
KCS34	2018.03.13		Delfini	Garnetb	5	1	132.314	223.322	470.341	4.02483	0.240014	15.8006	0.226417	5.51405	0.213899		-0.01961	-0.00087	12.4		605.93	42.736	603.917	16.0338	616.295	25.4037	729.235			1.66173		116.313	0.0484217	-	-	520.233	0.0717254
KCS34	2018.03.15		Delfini	Garnetb	6	1	132.237	223.422	470.456	4.52636	0.251122	16.5272	0.233032	5.9847	0.202821		-0.01844	-0.00234	16.8		692.218	46.2607	637.405	16.8473	670.083	24.4772	752.285			1.70393		115.738	0.00753399	266.108	0.041294	520.138	0.00573557
KCS34	2018.03.15		Delfini	Garnetb	6	2	-	223.633	470.372	-	-	16.7376	0.275462	5.90506	0.331822		-0.02487	0.00186	-		-	-	647.194	18.3549	660.968	38.7242	795.241			1.78334		-	-	266.109	0.0123427	520.132	0.00308084
KCS34	2018.03.15		Delfini	Garnetb	7	1	131.304	221.015	469.389	3.67872	0.208565	14.2611	0.243745	4.993	0.207972		-0.01671	-0.00145	13.2		547.775	36.6189	534.625	15.3091	556.965	24.4667	652.385			1.52314		115.653	0.00308227	265.967	0.0186665	520.062	0.00234133
KCS34	2018.03.15		Delfini	Garnetb	7	2	130.891	220.529	469.003	3.19079	0.233956	13.765	0.28986	4.42013	0.21892		-0.02041	0.00157	9.36		467.727	39.1336	512.778	16.4284	491.996	25.3852	650.723			1.52018		115.728	0.0854038	-	-	520.249	0.0471602
KCS34	2018.03.15		Delfini	Garnetb	7	3	131.579	222.937	469.928	3.86921	0.216783	16.1633	0.273203	5.39091	0.207885		-0.02208	0.00054	13.7		579.642	38.5077	620.571	17.7948	602.252	24.675	754.63			1.70824		115.737	0.0240409	-	-	520.203	0.0118323
KCS1621	2018.03.13		Delfini	Epidotec	1	1	131.634	219.945	469.188	3.38584	0.204292	12.3754	0.221344	4.4476	0.212641		-0.01272	-0.0025	12.5		499.455	35.0786	452.825	13.1835	495.106	24.7054	557.671	518 ± 52		1.46304		116.271	0.0114428	266.611	0.0540481	520.146	0.00903875
KCS1621	2018.03.13		Delfini	Epidotec	2	1	131.954	220.686	469.116	3.56386	0.230451	13.064	0.507691	4.31641	0.210878		-0.0152	-0.00113	19.9		528.728	39.727	482.303	24.0019	480.264	24.4486	585.168			1.52183		116.414	0.0916052	-	-	520.205	0.058121
KCS1621	2018.03.13		Delfini	Epidotec	3	1	131.681	221.691	469.656	3.36706	0.244085	14.1456	2.6417	4.8544	0.21561		-0.00453	-0.00684	3.93		496.383	41.2693	529.515	117.17	541.221	25.2344	458.803			1.25695		116.338	0.0916832	-	-	520.207	0.045278
KCS1621	2018.03.13		Delfini	Epidotec	4	1	132.193	223.002	469.029	3.88928	0.292714	15.1732	2.30828	4.37619	0.430944		-0.00519	-0.0072	12.4		583.019	50.838	575.406	104.859	487.025	49.0591	497.81			1.33727		116.328	0.019371	266.87	0.0644052	520.058	0.0143022
KCS1621	2018.03.16		Delfini	Epidotec	5	1	131.174	218.706	468.666	3.53783	0.23381	11.7983	0.722529	4.06144	0.306458		-0.00771	-0.005	15.4		524.429	40.1782	428.469	31.5384	451.46	34.9556	490.418			1.32195		115.645	0.0542149	-	-	520.199	0.0322581
KCS34	2018.03.15		Delfini	Epidoted	1	1	-	-	467.52	-	-	-	-	3.07421	0.331007		-	-	-		-	-	-	-	340.446	37.2752	-	343 ± 23		0.978781		115.759	0.0381264	-	-	520.111	0.0114837
KCS34	2018.03.15		Delfini	Epidoted	2	1	129.713	215.297	467.109	1.96001	0.237179	8.47983	1.19599	2.73973	0.357179		-0.00928	-0.00093	1.9		275.851	36.0788	294.559	46.7746	303.019	40.0558	367.761			1.03402		115.78	0.0829932	-	-	520.035	0.0856157
KCS34	2018.03.15		Delfini	Epidoted	3	1	129.929	214.442	467.266	2.17532	0.212556	7.6245	0.684441	2.80037	0.223218		-0.00575	-0.00272	4.79		308.379	32.9977	261.743	26.551	309.797	25.19	321.623			0.943616		115.781	0.0445103	-	-	520.131	0.0736359
KCS3	2018.03.13		Lotos	Garnetb	1	1	132.917	225.308	471.233	4.86271	0.202448	17.9537	0.210615	6.748	0.201864		-0.01739	-0.00438	17.4		751.424	39.4461	704.61	17.4666	757.712	24.8846	804.492	751 ± 76		1.80058		116.078	0.00335259	266.396	0.0128181	519.891	0.0063418
KCS3	2018.03.13		Lotos	Garnetb	1	2	132.044	222.37	469.714	3.98977	0.296291	15.0153	0.233499	5.22906	0.202087		-0.01954	-0.0002	11.8		599.987	51.7872	568.288	15.5972	583.816	23.9499	697.467			1.60405		116.078	0.00335259	266.396	0.0128181	519.891	0.0063418
KCS2	2018.03.13		Lotos	Epidotec	1	1	-	-	469.11	-	-	-	-	4.5179	0.385361		-	-	-		-	-	-	-	503.065	44.0081	-	531 ± 78		1.34819		-	-	-	-	519.998	0.0196114
KCS2	2018.03.13		Lotos	Epidotec	2	1	-	-	468.903	-	-	-	-	4.3108	0.716508		-	-	-		-	-	-	-	479.63	81.1978	-			1.29967		-	-	-	-	519.998	0.0196114
KCS2	2018.03.13		Lotos	Epidotec	3	1	-	-	469.543	-	-	-	-	4.95042	1.30378		-	-	-		-	-	-	-	552.126	148.258	-			1.45126		-	-	-	-	519.998	0.0196114
KCS2	2018.03.13		Lotos	Epidotec	4	1	-	-	468.823	-	-	-	-	4.23084	0.856773		-	-	-		-	-	-	-	470.59	96.9654	-			1.28108		-	-	-	-	519.998	0.0196114
KCS3	2018.03.13		Lotos	Epidotec	5	1	131.406	219.993	468.891	3.29667	0.281278	12.652	1.56059	4.51437	0.208278		-0.00914	-0.00396	5.38		484.905	46.9315	464.611	67.3762	502.666	24.257	495.339			1.34735		116.132	0.174561	-	-	519.782	0.0535475
KCS3	2018.03.13		Lotos	Epidotec	6	1	132.493	223.387	470.181	4.34429	0.236765	15.9983	1.846	5.69777	0.215756		-0.00318	-0.00942	13.3		660.617	43.2757	612.977	85.6926	637.269	25.7137	524.052			1.39203		116.172	0.124106	-	-	519.889	0.0357323
KCS3	2018.03.13		Lotos	Epidotec	6	2	130.717	217.73	467.547	2.61879	0.415438	10.2941	1.17323	3.0758	0.212493		-0.01573	0.00203	5.56		376.764	65.4333	366.471	48.1104	340.624	24.1035	465.651			1.27095		116.122	0.0132252	266.478	0.256538	519.877	0.00649432
KCS2	2018.03.15		Lotos	Epidotec	7	1	-	-	469.473	-	-	-	-	5.07334	0.241171		-	-	-		-	-	-	-	566.098	28.1698	-			1.48099		-	-	-	-	520.065	0.00502746
KCS2	2018.03.15		Lotos	Epidotec	7	2	-	-	468.818	-	-	-	-	4.4189	0.558955		-	-	-		-	-	-	-	491.857	63.4959	-			1.32493		-	-	-	-	520.065	0.00502746
KCS2	2018.03.15		Lotos	Epidotec	8	1	-	-	469.188	-	-	-	-	4.74656	0.223956		-	-	-		-	-	-	-	528.983	26.1004	-			1.40239		-	-	-	-	520.107	0.00482561
KCS3	2018.03.15		Lotos	Epidotec	9	1	-	-	468.058	-	-	-	-	3.76139	0.649081		-	-	-		-	-	-	-	417.632	73.2429	-			1.17359		-	-	-	-	519.962	0.011511
KCS3	2018.03.15		Lotos	Epidotec	10	1	131.812	223.225	470.408	4.06228	0.221432	16.4121	0.440995	5.88178	0.213497		-0.01894	-0.00178	8.79		612.291	39.8636	632.065	24.1105	658.305	25.5765	745.417			1.87708		115.777	0.018322	-	-	520.192	0.0111514
SY1402	2018.03.16		Lotos	Epidotec	11	1	-	-	470.408	-	-	-	-	5.46332	0.751966		-	-	-		-	-	-	-	610.508	86.0411	-			1.57657		-	-	-	-	520.54	0.0100786
SY1402	2018.10.08		Lotos	Epidotec	12	1	-	-	470.044	-	-	-	-	4.75148	0.530106		-	-	-		-	-	-	-	529.54	60.4352	-			1.40356		-	-	-	-	520.831	0.0426001
SY1402	2018.10.08		Lotos	Epidotec	12	2	-	-	470.591	-	-	-	-	5.29751	0.214262		-	-	-		-	-	-	-	591.611	25.3219	-			1.5357		-	-	-	-	520.831	0.0426001
KCS50	2018.03.16		Megas Gialos	Epidotec	1	1	-	-	469.105	-	-	-	-	4.13108	1.23787		-	-	-		-	-	-	-	459.321	139.879	-	494 ± 29		1.258		-	-	-	-	520.569	0.0278026
KCS50	2018.03.16		Megas Gialos	Epidotec	2	1	-	-	469.347	-	-	-	-	4.37468	2.40956		-	-	-		-	-	-	-	486.854	272.644	-			1.31458		-	-	-	-	520.567	0.00962478
KCS50	2018.03.16		Megas Gialos	Epidotec	2	2	-	-	469.847	-	-	-	-	4.87484	1.40739		-	-	-		-	-	-	-	543.541	159.926	-			1.43308		-	-	-	-	520.567	0.00962478
KCS50	2018.03.16		Megas Gialos	Epidotec	2	3	-	-	469.423	-	-	-	-	4.51542	1.07797		-	-	-		-	-	-	-	502.784	122.208	-			1.3476		-	-	-	-	520.502	0.0778547
KCS50	2018.03.16		Megas Gialos	Epidotec	3	1	-	-	469.437	-	-	-	-	4.46733	1.15809		-	-	-		-	-	-	-	497.34	131.222	-			1.33629		-	-	-	-	520.564	0.021
KCS50	2018.03.16		Megas Gialos	Epidotec	3	2	-	-	469.252	-	-	-	-	4.28256	0.82008		-	-	-		-	-	-	-	476.436	92.8649	-			1.29309		-	-	-	-	520.564	0.021
aAnalyses with an analysis time were carried out at ETH Zurich (ETH), the remaining anlayses were carried out at Virignia Tech (VT).
bAssumed entrapment temperature = 500 °C.
cAssumed entrapment temperature = 450 °C (ep1).
dEstimated entrapment temperature = 411 °C (ep2).
All garnet compositions modeled as Xalm = 0.7, Xgrs = 0.2, Xprp = 0.1.
All epidote compositions modeled as Xep = 0.5, Xcz = 0.5.
ePeak positions of quartz inclusions (not plasma line corrected).
fRelative to the Herkimer quartz before and after quartz inclusion analyses (ETH Zurich, linear drift correction), and relative to the average Herkimer quartz on day of analysis (VT, plasma line corrected).
gStrains calculated from 2 or 3 quartz bands, based on weighted fit.
hEntrapment pressures calculated from strains inclusion pressure (if calculated) or the 464 cm-1 band inclusion pressure.
iIf the Ar plasma line is not reported for a VT analysis, the closest Ar plasma line was used for corrections.

## Sheet: Table S4
Table S4. Comparison of entrapment pressures calculated with internal MATLAB script and EoSFit-Pinc.
		quartz-in-epidote		quartz-in-clinozoisite		quartz-in-garnet
		EoSFit-Pinc	MATLAB script	EoSFit-Pinc	MATLAB script	EoSFit-Pinc	MATLAB script
Pinc (MPa)*	Ttrap (°C)	Ptrap (GPa)■	Ptrap (GPa)■	Ptrap (GPa)●	Ptrap (GPa)●	Ptrap (GPa)‡	Ptrap (GPa)‡
100	200	0.356	0.357772	0.31	0.310394	0.304	0.30476
100	300	0.451	0.453486	0.397	0.397715	0.398	0.398762
100	400	0.564	0.566568	0.502	0.502011	0.508	0.509058
100	500	0.7	0.701618	0.628	0.628071	0.64	0.639934
100	600	0.861	0.862879	0.781	0.780623	0.795	0.795728
200	600	1.05	1.05112	0.933	0.931915	0.933	0.934847
300	600	1.254	1.25512	1.093	1.09356	1.081	1.08203
400	600	1.473	1.4742	1.265	1.26499	1.237	1.23677
500	600	1.708	1.70787	1.447	1.44576	1.397	1.39865
600	600	1.954	1.95578	1.635	1.63555	1.565	1.56736
Pinc = inclusion pressure, Ttrap = entrapment temperature, Ptrap = entrapment temperature.
*All calculations are at carried out at ambient temperature (T = 25 °C).
Entrapment pressures calculated by using the quartz properties provided in EoSFit-Pinc (Angel et al., 2017):
V0 = 118.26 Å3; α0 = -0.47 105 K-1; κ0 = 64.28 GPa; κ0' = 5.07; κ0'' = -0.079 GPa-1; δκ/δT = 0.016 GPa K-1.
■Entrapment pressures calculated by using the epidote properties of Cisneros et al. (2020).
V0 = 138.06 Å3; α0 = 2.25 105 K-1; κ0 = 115 GPa; κ0' = 6.7; κ0'' = -0.0582 GPa-1;Ghost = 65.7 GPa; Einstein_T = 512.38 K.
●Entrapment pressures calculated by using the clinozoisite properties of Cisneros et al. (2020).
V0 = 138.1 Å3; α0 = 2.24 105 K-1; κ0 = 147 GPa; κ0' = 4.0; κ0'' = -0.0272 GPa-1;Ghost = 84.0 GPa; Einstein_T = 528.58 K.
‡Entrapment pressures calculated by using the grossular garnet properties of Milani et al. (2017), provided in EoSFit-Pinc:
V0 = 1664.46 Å3; α0 = 2.09 105 K-1; κ0 = 167 GPa; κ0' = 5.0; κ0'' = -0.03 GPa-1; Ghost = 106 GPa; Einstein_T = 512 K.

## Sheet: Table S5
Table S5. Quartz-calcite δ18O values of boudin neck precipitates and calculated temperatures.
		δ18Oquartz	δ18Ocalcite	Δquartz-calcite	Temperature	Temperature
Sample	Location	(‰)	(‰)	(‰)*	°C‡	°C (1σ)
SY1613	Lotos	17.8048	15.76	2.04883	378.489	28.2538
SY1613 (duplicate)		17.8818
SY1617	Delfini	18.4788	16.7185	1.77649	426.657	32.1299
SY1617 (duplicate)		18.5738
SY1618	Delfini	18.3287	16.5162	1.78147	425.679	32.046
SY1623	Delfini	21.1088	19.2408	1.8374	414.959	31.1406
SY1623 (duplicate)		21.1218
*Δquartz-calcite = 103lnαquartz-calcite; αquartz-calcite = (1000 + δ18Oquartz)/(1000 + δ18Ocalcite).
‡Temperature calculated by using the Sharp and Kirschner (1994) quartz-calcite oxygen isotope fractionation calibration (A = 0.87 ± 0.06).
The average δ18O of quartz duplicates was used to calculate temperatures.

## Sheet: Table S6
Table S6. Epidote and omphacite compositions.
Sample	KCS34	1σ	KCS34	1σ	KCS34	1σ	KCS34	1σ	KCS34	1σ	KCS34	1σ
	epidote inclusion in titanite		ep2 (core) from St crenulation		ep2 (rim) from St crenulation		omphacite inclusion near garnet 1 rim		omphacite inclusion near garnet 1 core		omphacite inclusion near garnet 1 core
# n	3		7		3		3		5		4
SiO2	39.5066	0.271012	39.4345	0.628991	38.9142	0.996195	58.1092	0.458675	58.5001	0.265848	59.0341	0.782601
Al2O3	31.772	0.461159	27.4821	0.854277	22.9484	0.40392	18.1353	0.483482	18.6773	1.10725	19.0716	1.52138
Na2O	0.008346	0.0237935	0.005644	0.00726953	-0.00361333	0.00478341	14.145	0.0373314	14.126	0.143406	14.0923	0.144128
MgO	0.0860593	0.0706256	0.030828	0.0151687	0.299302	0.396573	0.237919	0.0493803	0.203922	0.0432986	0.219301	0.0816299
CaO	24.3089	0.64911	23.6732	0.621675	21.3443	2.16047	0.591411	0.0361264	0.714157	0.0595224	0.662664	0.0582588
Cr2O3	0.140916	0.128748	0.0296683	0.0472702	0.0186697	0.00760604	-0.00908333	0.0063782	-0.0134834	0.0142941	0.0058015	0.0236303
K2O	0.0380497	0.00427122	0.0143307	0.0107072	0.710353	0.827056	0.000476667	0.00115362	0.0021674	0.00213021	0.00145125	0.00250563
TiO2	0.347569	0.0652794	0.0842133	0.0450119	0.106351	0.0248882	0.168768	0.126903	0.0234296	0.0294673	0.066679	0.060596
FeO	1.9642	0.278936	7.26281	0.355132	12.0901	0.571391	8.50428	0.550466	8.21584	1.28505	7.78092	1.98739
MnO	0.158786	0.118712	0.0779196	0.0380261	0.261227	0.0171761	0.0405087	0.00966443	0.0323578	0.00643659	0.0303327	0.0159298
H2O	2.1258	0.00387977	2.07144	0.00364124	2.01755	0.0153806	-	-	-	-
Total	100.457	0.879765	100.167	1.70066	98.7068	0.685966	99.9237	0.459458	100.482	0.102804	100.965	0.653995
Cation sumsa,b,c
Si	2.99883	0.00640961	3.03881	0.00826	3.08373	0.0665133	2.01831	0.00600714	2.01937	0.00640915	2.02758	0.00768459
Al	2.8423	0.0259438	2.49534	0.0356581	2.14325	0.0222145	0.742326	0.0159925	0.759714	0.0419839	0.771627	0.0536325
Na	0.00124032	0.00352226	0.000851476	0.00109421	-0.000557088	0.000735487	0.952575	0.00398401	0.94541	0.00799997	0.938448	0.00379539
Mg	0.00978295	0.00810147	0.00356751	0.00185437	0.035274	0.0465995	0.0123238	0.00258955	0.0104982	0.00225431	0.0112111	0.00409573
Ca	1.97686	0.0379227	1.95428	0.0175312	1.81274	0.187972	0.022012	0.00139985	0.0264204	0.00230185	0.0243733	0.00191815
Cr	0.0084887	0.00781483	0.00184551	0.00297087	0.00117215	0.000486853	-0.000250016	0.000176231	-0.000367939	0.000389207	0.000154272	0.000643186
K	0.00368247	0.000382989	0.00139945	0.00104468	0.071674	0.0831413	2.13032e-05	5.10819e-05	9.57114e-05	9.42656e-05	6.32362e-05	0.000108692
Ti	0.0397362	0.0077981	0.00984589	0.00555158	0.0126864	0.00298934	0.00440497	0.00330835	0.000606692	0.000761838	0.00172617	0.00157699
Fe3+	0.124704	0.0177762	0.468444	0.0302797	0.801396	0.0407257	0.167477	0.0374953	0.148095	0.0494277	0.109895	0.0576785
Mn	0.0102506	0.00774622	0.00511779	0.00260445	0.0175369	0.00119591	0.00119137	0.000282747	0.000946563	0.00019093	0.000883886	0.000463869
Fe2+	-	-	-	-	-	-	0.0796102	0.0210079	0.0892087	0.0237364	0.114043	0.0167247
Cations, Oxygen Total	8.01588		7.9795		7.97891		5.91626		5.92595		5.94505
Xep, Xaeg	0.127837	0.019937	0.485118	0.0354607	0.847301	0.0262761	0.17171	0.0375675	0.152161	0.0499873	0.114171	0.0598753
Xcz, Xjd	0.863461	0.0164683	0.512971	0.0327893	0.151459	0.0257975	0.805709	0.0387555	0.820652	0.0514928	0.860513	0.058379
Xtaw, Xdi	0.00870198	0.00796297	0.0019112	0.0030988	0.0012393	0.000504628	0.0225816	0.00132285	0.0271868	0.00236391	0.0253161	0.0020187
# n denotes the number of individual of analyses.
aEpidote mineral formula (apfu) is calculated on the basis of 12.5 oxygen.
bOmphacite apfu is calculated on the basis of 4 cations.
cAll Fe in epidote is assumed to be Fe3+.

## Sheet: Table S7
Table S7. Recalculation of quartz-in-garnet barometry results from Ashley et al., 2014, Sifnos, Greece.
Incl.	Grt	Rad.a	Vol.b	Δω464c	464 cm-1	Ttrapd	Ptrape	Ptrapf
#	#	%	%	(cm-1)	Pincl (MPa)	(°C)	(GPa)	(GPa)
1	A	58.3	19.8	6.72	755	478	1.894	1.68523
2	A	75.3	42.7	7.61	858	498	2.13	1.8978
3	A	67	30	6	672	487	1.736	1.54397
4	A	63.8	26	5.6	626	483	1.635	1.45813
5	A	81.8	54.8	5.82	651	509	1.713	1.53085
6	A	15.6	0.4	6.07	679	460	1.724	1.53061
7	A	71.2	36	6.47	725	492	1.843	1.64685
8	B	51.7	13.8	6.43	721	472	1.816	1.61777
9	B	51.7	13.8	6.6	741	472	1.857	1.65371
10	B	54.6	16.3	6.64	745	475	1.867	1.66522
11	B	57.4	18.9	6.76	759	477	1.902	1.6927
12	B	56.7	18.2	6.52	731	476	1.845	1.6409
13	C	70.8	35.5	6.3	707	492	1.804	1.61137
14	C	80.2	51.5	6.59	740	506	1.893	1.68684
15	C	92.5	79	6.57	737	531	1.904	1.70972
16	C	92.5	79	5.66	633	531	1.698	1.5233
17	C	32.6	3.5	6.59	739	463	1.847	1.64242
18	C	19	0.7	7.51	846	461	2.068	1.83888
a% radial distance of inclusion from garnet core.
b% volume distance of inclusion from garnet core.
cQuartz inclusion 464 cm-1 band position relative to a quartz standard 464 cm-1 band position.
dTemperatures are inferred based on inclusion positions within the host garnet, assuming constant volumetric growth rates between crystal core (at 460 °C) and rim (550 °C) [from Dragovic et al., 2012].
eEntrapment pressures calculated in Ashley et al., 2014.
eUpdated entrapment pressures calculated with the approach described within the main manuscript, quartz properties from Angel et al., 2017, and a garnet composition of Xalm = 0.7, Xgrs = 0.2, Xprp = 0.1.

## Sheet: Table S8
Table S8. Recalculation of quartz-in-garnet barometry results from Behr et al., 2018, Sifnos, Greece.
	Incl.	ω464	Δω464a	464 cm-1	Ttrapb	Ptrapc	Ptrapd	Ptrape
Sample	#	(cm-1)	(cm-1)	Pincl (MPa)	(°C)	(GPa)	(GPa)	(GPa)
KCS38	1	471.17	6.85	769	500	1.523	1.73778	1.73471
KCS38	2	470.16	5.84	653	500	1.335	1.52809	1.52423
KCS38	3	471.17	6.86	770	500	1.525	1.73962	1.73656
KCS38	4	470.84	6.52	732	500	1.462	1.67011	1.66677
KCS53	1	471.66	7.21	812	500	1.594	1.81735	1.8146
KCS53	2	471.33	6.89	774	500	1.531	1.74698	1.74395
KCS53	3	471.72	7.28	819	500	1.605	1.83039	1.8277
KCS53	4	471.82	7.27	818	500	1.604	1.82853	1.82583
KCS53	5	471.39	6.84	768	500	1.521	1.73594	1.73286
KCS53	6	471.72	7.17	806	500	1.585	1.80619	1.80339
KCS54B1	1	470.05	5.61	627	500	1.293	1.4821	1.47808
KCS54B1	2	470.71	6.26	702	500	1.414	1.61578	1.61224
KCS55B	2	471.68	7.23	814	500	1.597	1.82107	1.81834
KCS55B	3	471.6	7.16	805	500	1.583	1.80433	1.80153
KCS55B	5	471.06	6.61	742	500	1.479	1.68832	1.68506
KCS55B	6	471.33	6.89	774	500	1.532	1.74698	1.74395
aQuartz inclusion 464 cm-1 band position relative to a quartz standard 464 cm-1 band position.
dAssumed entrapment temperatures from Behr et al., 2018.
cEntrapment pressures calculated in Behr et al., 2018.
dUpdated entrapment pressures calculated with the approach described within the main manuscript, quartz properties from Angel et al., 2017, and a garnet composition of Xalm = 1.
eUpdated entrapment pressures calculated with the approach described within the main manuscript, quartz properties from Angel et al., 2017, and a garnet composition of Xalm = 0.7, Xgrs = 0.2, Xprp = 0.1.
